1 **Cardiopulmonary Exercise Testing in a Prospective Multicenter Cohort of Older Adults:**  
2 **The Study of Muscle, Mobility and Aging (SOMMA)**

3

4 Cody Wolf, MS<sup>1\*</sup>; Terri L. Blackwell, MA<sup>2\*</sup>; Eileen Johnson, MPH<sup>2</sup>; Nancy W. Glynn, PhD<sup>3</sup>;  
5 Barbara Nicklas, PhD<sup>4</sup>; Stephen B. Kritchevsky, PhD<sup>4</sup>; Elvis A. Carnero, PhD<sup>5</sup>; Peggy M.  
6 Cawthon, PhD, MPH<sup>2,6</sup>; Steven R. Cummings, MD<sup>2,6</sup>; Frederico G. S. Toledo, MD<sup>7</sup>; Anne B.  
7 Newman, MD, MPH<sup>3</sup>; Daniel E. Forman, MD<sup>8\*</sup>; Bret H. Goodpaster, PhD<sup>5\*</sup>

8

9 <sup>1</sup>Department of Health and Physical Activity, University of Pittsburgh, Pittsburgh, Pennsylvania,  
10 USA.

11 <sup>2</sup>San Francisco Coordinating Center, California Pacific Medical Center Research Institute, San  
12 Francisco, California, USA.

13 <sup>3</sup>Department of Epidemiology, University of Pittsburgh, Pittsburgh, Pennsylvania, USA.

14 <sup>4</sup>Department of Internal Medicine-Gerontology and Geriatric Medicine, Wake Forest University  
15 School of Medicine, Winston-Salem, North Carolina, USA.

16 <sup>5</sup>Translational Research Institute, AdventHealth, Orlando, FL, USA.

17 <sup>6</sup>Department of Epidemiology and Biostatistics, University of California, San Francisco,  
18 California, San Francisco, California, USA.

19 <sup>7</sup>Department of Medicine-Division of Endocrinology and Metabolism, University of Pittsburgh  
20 School of Medicine, Pittsburgh, Pennsylvania, USA.

21 <sup>8</sup>Department of Medicine (Geriatrics and Cardiology) University of Pittsburgh; Geriatrics  
22 Research, Education and Clinical Care (GRECC), VA Pittsburgh Healthcare System, Pittsburgh,  
23 PA

24 \*These authors contributed equally

25 Corresponding authors:

26 Bret H. Goodpaster, PhD

27 Translational Research Institute

28 301 East Princeton Street

29 Orlando, FL 32804email: [bret.goodpaster@adventhealth.com](mailto:bret.goodpaster@adventhealth.com)

30

31 Short Title: Cardiopulmonary Exercise Testing in Older Adults

32 Keywords: cardiorespiratory fitness, aging, frailty, muscle, VO<sub>2</sub>peak

33 Abstract word count: 350

34 Main text word count: 4965

35 Number of Figures: 4

36 Number of Tables: 4

37 Number of References: 40

38 **ABSTRACT**

39 **BACKGROUND:** Cardiorespiratory fitness (CRF) measured by peak oxygen consumption  
40 ( $\text{VO}_2\text{peak}$ ) declines with aging and correlates with mortality and morbidity. Cardiopulmonary  
41 Exercise Testing (CPET) has long been the criterion method to assess CRF, but its feasibility,  
42 efficacy and reliability in older adults is unclear. The large, multicenter Study of Muscle,  
43 Mobility and Aging (SOMMA) employed CPET to evaluate the mechanisms underlying declines  
44 in mobility with aging among community-dwelling older adults. Our primary objective was to  
45 design and implement a CPET protocol in older adults that was dependable, safe, scientifically  
46 valuable, and methodologically reliable.

47 **METHODS:** CPET was performed using treadmill exercise in 875 adults  $\geq 70$  years. A  
48 composite protocol included a symptom-limited peak exercise phase and two submaximal phases  
49 to assess cardiopulmonary ventilatory indices during 1) participants' preferred walking speed  
50 and 2) at slow walking speed of 1.5 mph (0.67 m/s). An adjudication process was in place to  
51 review tests for validity if they met any prespecified criteria ( $\text{VO}_2\text{peak} < 12.0$  ml/kg/min;  
52 maximum heart rate (HR)  $< 100$  bpm; respiratory exchange ratio (RER)  $< 1.05$  and a rating of  
53 perceived exertion  $< 15$ ). A repeat test was performed in a subset (N=30) to assess  
54 reproducibility.

55 **RESULTS:** CPET was safe and well tolerated, with 95.8% of participants able to complete the  
56  $\text{VO}_2\text{peak}$  phase of the protocol. Only 56 (6.4%) participants had a risk alert during any phase of  
57 testing and only two adverse events occurred during the peak phase: a fall and atrial fibrillation.  
58 The average  $\pm$  standard deviation for  $\text{VO}_2\text{peak}$  was  $20.2 \pm 4.8$  mL/kg/min, peak HR  $142 \pm 18$   
59 bpm, and peak RER  $1.14 \pm 0.09$ .  $\text{VO}_2\text{peak}$  and RER were slightly higher in men than women.  
60 Adjudication was indicated in 47 participants; 20 were evaluated as valid, 27 as invalid (18 had a

61 data collection error, 9 did not reach VO<sub>2</sub>peak). Reproducibility of VO<sub>2</sub>peak was high (intraclass  
62 correlation coefficient=0.97).

63 **CONCLUSIONS:** CPET was feasible, effective and safe for community-dwelling older adults,  
64 many of whom had multimorbidity and frailty. These data support a broader implementation of  
65 CPET to provide important insight into the role of CRF and its underlying determinants in aging  
66 and age-related conditions and diseases.

67

68 **Clinical Perspective**

69

70 **What Is New?**

- 71 • Performing cardiopulmonary exercise testing in a community dwelling older adult with  
72 multimorbidities or frailty is feasible and exceptionally safe under highly trained exercise  
73 physiologists and physician supervision.
- 74 • Reproducibility of VO<sub>2</sub>peak among community-dwelling older adults with significant  
75 clinical complexity was high (intraclass correlation coefficient=0.97).
- 76 • The VO<sub>2</sub>peak observed was comparable to established normative data for older adults,  
77 and adds merit to the limited data collected on VO<sub>2</sub>peak norms in older adults.

78 **What Are the Clinical Implications?**

- 79 • Ventilatory gas collection during clinical cardiac stress testing may be valuable to plan of  
80 care in routine management of older adults due to the important role of aerobic fitness on  
81 morbidity and mortality.
- 82 • Cardiopulmonary exercise testing can provide insight into the role of cardiorespiratory  
83 fitness and its underlying determinants in aging and age-related conditions and diseases.

84

## 85 Non-standard Abbreviations and Acronyms

|                 |                                                        |
|-----------------|--------------------------------------------------------|
| ACSM            | American College of Sports Medicine                    |
| APMHR           | Age-Predicted Maximal Heart Rate                       |
| BMI             | body mass index                                        |
| BP              | blood pressure                                         |
| CES-D           | Center for Epidemiological Studies-Depression          |
| CHAMPS          | Community Healthy Activities Model Program for Seniors |
| CI              | confidence interval                                    |
| CPET            | cardiopulmonary exercise testing                       |
| CRF             | cardiorespiratory fitness                              |
| CV              | coefficient of variation                               |
| ECG             | Electrocardiogram                                      |
| EC <sub>w</sub> | energetic cost of walking                              |
| HR              | heart rate                                             |
| ICC             | intraclass correlation coefficient                     |
| MET             | metabolic equivalent of task                           |
| MR              | magnetic resonance                                     |
| PWS             | preferred walking speed                                |
| RER             | respiratory exchange ratio                             |
| RPE             | rating of perceived exertion                           |
| SD              | standard deviation                                     |
| SOMMA           | Study of Muscle, Mobility and Aging                    |
| SWS             | slow walking speed                                     |

|                      |                           |
|----------------------|---------------------------|
| VCO <sub>2</sub>     | carbon dioxide exhalation |
| VE                   | minute ventilation        |
| VO <sub>2</sub>      | oxygen inhalation         |
| VO <sub>2</sub> peak | peak oxygen consumption   |

86

## 87 INTRODUCTION

88       Cardiorespiratory fitness (CRF) refers to the capacity of the circulatory and respiratory  
89 systems to supply oxygen to skeletal muscle mitochondria for energy production needed during  
90 physical activity.<sup>1</sup> Peak oxygen consumption ( $\text{VO}_2\text{peak}$ ) is the criterion measure of CRF, which  
91 declines with aging, is a key metric of physical function and a strong predictor of risk for  
92 morbidity and mortality.<sup>2</sup> It is often applied to diagnose and evaluate the effects of disease as  
93 well as constitutive physiologic mechanisms.<sup>3</sup>  $\text{VO}_2\text{peak}$  assessed using symptom-limited  
94 cardiopulmonary exercise testing (CPET) is a vetted criterion metric of CRF.<sup>1,4,5</sup> CPET entails an  
95 exercise provocation to stimulate integrated physiologic responses (cardiac, pulmonary, muscle,  
96 autonomic, circulatory) that can be assessed through patterns in ventilatory indices.<sup>1,6</sup>  
97 Measurements of oxygen consumption ( $\text{VO}_2$ ), carbon dioxide production ( $\text{VCO}_2$ ), minute  
98 ventilation, and associated indices during progressive exercise intensity assess aerobic capacity,  
99 ventilatory efficiency, and other aspects of physical function. These can discern patterns of  
100 performance and physical limitation, with a wide range of clinical and research applications. The  
101 reliability of CPET for measuring CRF in younger populations has been well-established.<sup>1,7</sup> Its  
102 application, feasibility and reliability in older adults, however, is less certain. Studies to validate  
103  $\text{VO}_2\text{peak}$  in older adults have been limited to small sample sizes, with many lingering questions  
104 regarding their feasibility, reliability and safety amidst age-related issues of mobility  
105 impairments, multimorbidity, frailty, fear of falling or maximal exertion.<sup>8,9</sup>

106       The conceptual value of CRF assessments using CPET in older adults is strong.  $\text{VO}_2\text{peak}$   
107 correlates with physical function<sup>10-12</sup>, frailty, disability, and mortality<sup>13</sup> in older adults. CPET has  
108 been useful in determining the etiology of dyspnea, a common problem for older adults.<sup>1</sup>



109 Likewise, CPET is useful in determining diagnosis, prognosis and management of heart failure,  
110 chronic obstructive lung disease and other clinical challenges pertinent to older adults.<sup>1</sup>

111 In the Study of Muscle, Mobility and Aging (SOMMA), a study designed to distinguish  
112 subcellular mechanisms in skeletal muscle underlying mobility disability and functional decline  
113 over a three year period in older adults, CPET is integral to the primary study objectives to  
114 clarify key relationships between skeletal muscle mitochondrial respiration and CRF. Optimal  
115 accuracy of CPET is paramount to better understand these relationships.<sup>14</sup> SOMMA and other  
116 studies of aging and age-related conditions and diseases require a CPET protocol that is  
117 dependable, safe and reliable.

118 Many rudimentary issues for exercise testing become more complex for older adults,  
119 especially those who have no prior experience with exercise testing or training. Goals to achieve  
120 adequate motivation and confidence for a high exercise workload are often difficult, especially as  
121 many older adults become fearful at higher exercise intensities. While CPET using a bicycle has  
122 advantages of stability and safety, cycling is not an exercise that is familiar to many older  
123 Americans. In comparison, walking is a more familiar exercise that may provide a more  
124 meaningful evaluation of physiologic capacities, but concerns regarding walking limitations (gait  
125 instability, pain) and safety (falls, anxiety, hemodynamics, arrhythmia) may also increase with  
126 treadmill modes.<sup>15-17</sup> Similarly, while breathing through a mouthpiece is commonly employed  
127 for CPET, the discomfort associated with mouthpieces may become disproportionate due to  
128 changes in jaw strength and dentition, and difficulty tolerating a nose clip and breathing  
129 exclusively through the mouth. For many older adults, face masks provide greater comfort and  
130 feasibility during exercise. However, it is not clear if face masks can achieve effective air seals

131 for accurate ventilatory measurements for those experiencing age-related changes in facial  
132 structure.<sup>18</sup>

133 The primary aim of this report was to provide a detailed overview of the SOMMA CPET  
134 protocol. We report methods to achieve dependable assessments of cardiorespiratory fitness  
135 ( $\text{VO}_2\text{peak}$ ) and submaximal exercise performance with associated safety and reliability. We also  
136 examine feasibility of CPET among subpopulations in SOMMA with functional limitations and  
137 comorbidities.

138

## 139 **METHODS**

### 140 ***SOMMA Participants***

141 Details of the design of SOMMA are published elsewhere (<https://sommaonline.ucsf.edu>).<sup>19</sup>  
142 Volunteers were recruited at two clinical sites (University of Pittsburgh and Wake Forest  
143 University School of Medicine) from April 2019 to December 2021.<sup>19</sup> Individuals were eligible  
144 to participate if they were  $\geq 70$  years old, willing and able to complete a skeletal muscle biopsy  
145 and undergo magnetic resonance (MR). Individuals were excluded if they reported an inability to  
146 walk  $\frac{1}{4}$  mile or climb a flight of stairs; had body mass index (BMI)  $\geq 40$   $\text{kg}/\text{m}^2$ ; had an active  
147 malignancy or dementia; had medical contraindication to biopsy or MR. Finally, participants  
148 must have been able to complete the 400-meter walk; those who seemed unable to do so at the  
149 screening visit completed a 4-meter walk to ensure their walking speed was  $\geq 0.6$   $\text{m}/\text{s}$ . All  
150 participants provided written informed consent, and the study was approved by the WIRB-  
151 Copernicus Group. The goal was to collect CPET data on all participants at the baseline visit.  
152 The SOMMA baseline data was collected over three separate visits, with a goal of completion

153 within 30 days. The first visit included a 400-meter walk test, strength and physical function  
154 measures, a detailed medical review of medical history and a resting electrocardiogram (ECG).  
155 CPET was done at the second visit. This provided the CPET team several days to obtain any  
156 pertinent details of prior ECGs or medical history to ensure each participant's safety to complete  
157 the anticipated CPET. Completion of the 400-meter walking test provided SOMMA participants  
158 with an initial experience of a monitored functional assessment that contributed to greater  
159 confidence for the later CPET.

160

### 161 ***Rationale for CPET Protocol Selection***

162 The CPET protocol was developed by a working group of exercise physiologists and  
163 investigators with expertise in studies of older adults. CPET in SOMMA was performed using  
164 treadmill exercise with the rationale that walking is a more universally familiar exercise to older  
165 adults than bicycling. Walking was also better aligned with functional capacities needed for  
166 independent mobility. The SOMMA CPET protocol was structured with 3 phases to capture a  
167 full range of functional domains: (Phase 1) preferred walking speed (PWS); (Phase 2)  
168 progressive exercise with increasing incline to evaluate  $VO_2$ peak (Peak); (Phase 3) slow walking  
169 speed (SWS). The reasoning for a three-phase protocol was to observe peak aerobic capacity and  
170 incorporate other novel submaximal indices of walking energetics.<sup>10</sup>

171 CPET was conducted by experienced exercise physiologists under the supervision of a  
172 physician or physician assistant. Staff conducting CPET went through formal, centralized  
173 training with steps to standardize the testing process, including participant encouragement.  
174 Contraindications for exercise testing were consistent with standard American College of Sports

175 Medicine (ACSM) guidelines.<sup>20</sup> To further optimize safety, eligibility screening included an  
176 “alert system”, where potential safety concerns were systematically reviewed. These potential  
177 concerns, grouped as low and high risk, included identification of alerts from blood pressure  
178 (BP), heart rate (HR), and ECG that warranted further evaluation before CPET testing or, if  
179 occurring during CPET, stopping testing and evaluating clinically (Listed in Table 1). Pre-CPET  
180 low-risk alerts required clearance by the study physician for CPET to proceed or were not  
181 cleared for Phase 2, while high-risk alerts led to a hold until participants were cleared by their  
182 personal physician, the study physician and the study medical safety officer. Alerts during CPET  
183 were consistent with the ACSM guideline’s relative and absolute contraindications for stopping  
184 the test.<sup>20</sup>

185

### 186 *CPET Equipment*

187 Exercise was performed on a treadmill (Trackmaster, Full Vision Inc. Newton, KS) coupled  
188 with a cardiopulmonary metabolic cart (Medgraphics Ultima Series, Medgraphics Corporation,  
189 St. Paul, MN). Breath-by-breath ventilatory measurements were assessed using face masks (Hans  
190 Rudolph Inc., Shawnee, KS) fitted to each participant according to size options. Initially, an  
191 adjustable neoprene face mask that was designed to stretch over participants’ faces was used  
192 (Medgraphics, n=94). After discovering inconsistencies in ventilatory measurements from the  
193 neoprene mask, its use was discontinued and the Hans Rudolph mask was used. If a participant  
194 preferred, a mouthpiece and nose clip were substituted for the face mask (n=3 participants).

195 12-lead (Mason-Likar) ECG waveforms and pulse oxygen saturation (Nonin Inc., Plymouth,  
196 MN) were monitored continuously. HR, BP and rating of perceived exertion (RPE)<sup>21</sup> were  
197 assessed in each of three phases of the CPET protocol.

198

### 199 ***Familiarization***

200 A familiarization period was performed prior to starting the CPET protocol. The goal of  
201 familiarization was to first demonstrate and then ensure the participant could achieve proper  
202 walking gait, and then explain each phase of the protocol. Exercise physiologists demonstrated  
203 these steps before encouraging the participants to repeat them and confirm successful learning.  
204 Familiarization included emphasis on the importance of normal stride length, safe positioning,  
205 regular breathing, and focusing eyes ahead. The speeds utilized at each phase were demonstrated,  
206 differentiating between PWS and SWS. Following the familiarization period, the participant was  
207 prepared with electrode lead placement and face mask fitting. Participants then sat for resting  
208 hemodynamics.

209

### 210 ***The CPET Protocol***

211 The CPET protocol was structured with three phases: (Phase 1) preferred walking speed  
212 (PWS); (Phase 2) progressive exercise with increasing incline to evaluate VO<sub>2</sub>peak (Peak);  
213 (Phase 3) slow walking speed (SWS). Phases 1 and 2 were conducted sequentially without  
214 interruption. After Phase 2, participants were given a 20-minute rest before beginning Phase 3.

215 Phase 1 consisted of 5 minutes of treadmill walking at each participant's PWS with 0%  
216 incline. The PWS was based on the participant's gait speed during the 400-meter walk test that  
217 was completed at the first SOMMA study visit. Continuous collection of ventilatory gases was  
218 performed as participants walked, along with assessments of RPE and manual BP at minutes 4  
219 and 5.

220 The exercise physiologists used consistent coaching phrases to describe Phase 1 as a "warm-  
221 up" before the progressive intensity exercise of Phase 2 began. However, if a participant reached  
222 a peak effort during Phase 1 (n=4), exercise intensity would not increase, and CPET would  
223 progress directly to recovery part of Phase 2.

224 Phase 2 entailed a progression of exercise intensity to achieve  $VO_{2peak}$ . The goals were to  
225 achieve a respiratory exchange ratio (RER)  $\geq 1.05$  and/or RPE  $\geq 17$ . The  $VO_{2peak}$  is defined as  
226 the highest 30-second average of  $VO_2$  achieved during Phase 2. The Peak protocol was premised  
227 on a Modified Balke protocol<sup>17</sup> with systematized modifications to better suit the SOMMA  
228 population.

229 Whereas the Modified Balke protocol usually entails walking at either 2.0 or 3.0 mph (0.89  
230 or 1.34 m/s), in SOMMA the initial treadmill speed was the PWS. If a participant's PWS was  
231  $< 2.0$  mph (0.89 m/s), the initial speed used in Phase 2 was increased, but with discretion by the  
232 exercise physiologist to select a speed that was well tolerated; the initial speeds used in Phase 2  
233 were  $< 2.0$  mph (0.89 m/s) for 49 participants. Furthermore, the Modified Balke protocol usually  
234 starts at a 2.5% incline and increases 2.5% at each 2-minute stage thereafter until a participant  
235 reaches volitional fatigue. In SOMMA, 2.5% increases in treadmill incline were made every 2  
236 minutes, but limited to a maximal incline of 10% to avoid biomechanically awkward walking at  
237 steeper angles. Thereafter, higher exercise intensity beyond the 10% incline relied on increasing

238 treadmill speed up to 0.5 mph (0.22 m/s) at each 2-minute stage until volitional fatigue. To evoke  
239 a maximal effort, participants were prompted before each change in speed and incline and  
240 encouraged to continue until they could no longer maintain the given workload. Every 2 minutes  
241 and at peak performance, HR, BP and RPE were assessed.

242 Once the participant reached volitional fatigue, a 1-minute recovery period walking at 1 mph  
243 (0.45 m/s) and 0% incline was initiated, followed by 4 minutes of seated recovery. During the  
244 recovery periods continuous assessments of ventilatory indices, ECG, HR, and oxygen saturation  
245 were completed as well as monitoring of BP and RPE at minute 5. The participant was asked to  
246 continue sitting for the remainder of the 20-minute recovery period.

247 During Phase 3, the participant walked on the treadmill at 1.5 mph (0.67 m/s) and 0% incline,  
248 with continuous collection of ventilatory gases and assessments of RPE at minutes 4 and 5 and  
249 manual BP at minute 5.

250 Throughout each of the phases of testing, risk alerts associated with the exercise provocation  
251 were carefully monitored and addressed by the supervising exercise physiologist and clinician as  
252 per ACSM guidelines.<sup>20</sup>

253

#### 254 ***Quality Control***

255 The CPET metabolic cart received maintenance every 6 months to ensure proper calibration  
256 (ventilatory, treadmill speed, grade). The CPET working group optimized the protocol and face  
257 mask used for testing, created a format for saving and sharing data, and created an adjudication  
258 process to review validity of tests in question. The CPET working group met regularly to review

259 protocol questions, safety and data quality. Data collected were reviewed monthly by the  
260 working group to evaluate consistency between sites in the application of the protocol.

261

### 262 *Adjudication of VO<sub>2</sub>peak Data*

263 To ensure that Phase 2 data were accurate, tests were adjudicated if they met at least one of the  
264 following criteria: VO<sub>2</sub>peak <12 ml/kg/min; maximum RPE <15 and maximum RER<1.05 (up to  
265 the start of recovery); maximum HR <100 bpm. Adjudicators were assigned from the CPET  
266 working group and were provided with data from CPET along with participant characteristics  
267 (age, sex, anthropometrics, gait speed, medication use). Adjudicators determined the validity of  
268 the Phase 2 data, as well as indicated if the data had a systematic problem and should not be used  
269 for the other two phases.

270

### 271 *Repeatability*

272 Repeatability testing was conducted on a convenience sample of n=30 (15 per site, equal  
273 number by sex), who repeated all phases of the CPET protocol. The goal was for the repeat tests  
274 to be completed 7 days after the initial CPET, at the same time of day.

275

### 276 *Assessment of Walking Energetics*

277 To examine walking energetics for both Phases 1 and 3 (PWS, SWS), the energetic cost of  
278 walking (EC<sub>w</sub>) was calculated as the average VO<sub>2</sub> consumption from the last 3 minutes of each  
279 test. We derived the energy cost-capacity ratio of both phases as  $100 \cdot EC_w / VO_{2peak}$ .<sup>11</sup>



280

## 281 ***Participant Phenotypes and Characteristic Data***

282 SOMMA recruited community-dwelling older adults with diverse characteristics.  
283 Multimorbidity, frailty and recurrent falling were quantified as it is often assumed that these  
284 subpopulations are unable to complete maximal exercise testing. Depression was defined as a  
285 score  $\geq 10$  on the Center for Epidemiological Studies Depression Scale (CES-D-10).<sup>22</sup>  
286 Information on self-reported history of chronic health conditions and depression was combined  
287 to create the SOMMA multimorbidity index (0-11).<sup>23</sup> The frailty phenotype was defined  
288 following the criteria by Fried et al.<sup>24</sup> Participants reported information about lifestyle, falls  
289 history, mobility limitations, smoking status and medication use.<sup>25,26</sup> Participants were  
290 categorized as recurrent fallers if they reported  $\geq 2$  falls in the past year. Self-reported physical  
291 activity was assessed with the Community Healthy Activities Model Program for Seniors  
292 (CHAMPS) questionnaire.<sup>27</sup> Age predicted maximal heart rate (APMHR) was estimated as  $208 -$   
293  $0.7 * \text{age}$ .<sup>28</sup> Slow gait speed was defined as  $\leq 0.8$  m/s on the 4-meter test. Obesity was defined as  
294  $\text{BMI} \geq 30$  kg/m<sup>2</sup>.

295

## 296 ***Statistical Analysis***

297 Participant characteristics, phenotypic data and CPET phase completion were summarized by  
298 means and standard deviations (SD) for continuous variables, counts and percentages for  
299 categorical variables. Differences in these characteristics between participants cleared or  
300 excluded from the Phase 2 portion of CPET were analyzed using t-tests or Wilcoxon rank-sum  
301 tests for continuous variables,  $\chi^2$  tests for categorical characteristics. Similar comparisons were

302 performed by phenotype and mask type. Similarly, differences in CPET measures by sex was  
303 analyzed. The distribution of  $VO_2$ peak across age was displayed graphically.

304 For the repeatability analysis, differences between CPET parameters from the original and  
305 repeat measures were examined using paired t-tests. Agreement between the two measures was  
306 examined with correlations and intraclass correlation coefficients (ICC) and 95% confidence  
307 intervals (CI), computed using a 2-way analysis of variance. A coefficient of variation (CV) was  
308 also calculated.<sup>29</sup> Bland-Altman plots were presented to assess systematic bias in the differences  
309 in measurement of four parameters of Phase 2 ( $VO_2$ peak, maximum RER, maximum HR,  
310 maximum RPE).<sup>30</sup> Formal tests of systematic bias were performed using linear regression to  
311 examine whether the scatter in the Bland-Altman plots was heteroscedastic.<sup>31</sup> A mixed models  
312 approach was used to examine the fixed effect of site and order of test (original vs. repeat).

313 Significance levels reported were 2-sided. Statistical analyses were performed using SAS  
314 software, version 9.4 (SAS Institute, Inc, Cary, NC).

315

## 316 **RESULTS**

### 317 *Participant Characteristics*

318 Of the 879 SOMMA participants, 875 performed CPET. Of the 4 who had no CPET  
319 performed, 2 were never screened for CPET, one was not cleared for testing, and one was  
320 cleared but was unable to use the treadmill. Of the 875 who attempted CPET, 84.8% were White;  
321 59% were women; average age was  $76.3 \pm 5.0$  years; and average BMI was  $27.6 \pm 4.6$  kg/m<sup>2</sup>.  
322 The average 4-meter usual-pace gait speed was  $1.04 \pm 0.20$  m/s. Only 41 (4.8%) had 3 or more  
323 chronic conditions. Based on CHAMPS, participants reported an average baseline of 7 hours per  
324 week of moderate-intensity physical activity (Table 2).

325 Of the 875 cleared for CPET, 19 (2.2%) were only cleared for the two sub-peak phases  
326 (PWS, SWS). They were older, had slower average gait speed, more likely to have a history of  
327 atrial fibrillation, were more likely to be a recurrent faller and had a higher prevalence of frailty  
328 ( $p < 0.05$  for all, Table 2).

329

### 330 *Comparison of Face Mask Type*

331 Comparison of data from participants by mask type showed that the Hans Rudolph masks  
332 achieved greater consistency of ventilatory measures than the neoprene face mask.  $VO_{2peak}$  was  
333 similar for participants wearing either type of mask ( $p = 0.29$ ). However, participants wearing the  
334 Hans Rudolph mask were less likely to have their tests identified for adjudication (7.89% vs  
335 17.02%,  $p < 0.01$ ). Of those participants with tests that needed adjudication, those wearing the  
336 Hans Rudolph mask were more likely to be adjudicated as valid (77.78% vs 25.00%,  $p < 0.01$ ).  
337 Few participants ( $n = 6$ ) had Phase 2 (Peak) stopped due to mask discomfort.

338

### 339 *Completion of the 3 Phases of CPET*

340 As shown in Figure 1, there was a high rate of completion for the CPET protocol; 863  
341 (98.6%) completed Phase 1 (PWS) and 860 (98.3%) completed Phase 3 (SWS). A total of 852  
342 (97.3%) performed Phase 2 (Peak). Older participants were less likely to finish Phase 1 or Phase  
343 2, but had similar completion rates to younger participants for Phase 3 (Supplemental Table 1).  
344 Compared to non-frail participants, those classified as frail were more likely to not be cleared for  
345 Phase 2 (9.09% vs 1.60%). Recurrent fallers were also more likely not to be cleared for Phase 2  
346 (5.41% vs 1.70%). Recurrent fallers who completed the CPET protocol, however, had similar

347 rates of risk alerts during the test as those who fell 0-1 times in the past year. Those “slow  
348 walkers” were more likely to be unable to complete Phase 2 (Supplemental Table 2). Those with  
349 3 or more comorbidities were more likely to not have performed Phase 2 and were more likely to  
350 have stopped the protocol before reaching Phase 3. There were no differences in test completion  
351 by obesity (Supplemental Table 3).

352

### 353 ***Pre-CPET Risk Alerts***

354 Of the 876 screened for CPET eligibility, 189 (22%) had a low-risk alert during screening or  
355 CPET (Table 1). Blood pressure and ECG risk alerts during screening were common and were  
356 typically judged to be not serious such that the protocol was continued. Of the participants with a  
357 risk alert that occurred during screening, 94% were cleared for all 3 phases, and only 11% of  
358 those participants had an alert during CPET.

359

### 360 ***Safety During CPET***

361 Very few participants had a risk alert during Phases 1 and 3 [PWS 5 (0.6%), SWS 2 (0.2%)]  
362 (Table 1). Among 852 participants who attempted Phase 2 (Peak), 6% had a risk alert, although  
363 most went on to complete Phase 3. The most common alert during testing was acute ischemia  
364 pattern of ST-T changes (Phase 1, n=3; Phase 2, n=27; Phase 3, n=1). The medical safety officer  
365 was notified of all high risk alerts or adverse events occurring during CPET (n=50 participants).  
366 With the exception of 7 participants for whom the high risk alert was for a known condition, the  
367 remaining 43 participants were either contacted in person (by phone, email, letter), or were  
368 referred for medical treatment. There were two adverse events that occurred during Phase 2

369 (Peak). One participant fell on the treadmill. This adverse event resolved in one day with no need  
370 for treatment, and was classified as mild severity with minor skin irritation and soft tissue  
371 effects. One participant developed atrial fibrillation during the test and was referred to the  
372 emergency room for treatment, resulting in an overnight hospitalization. This event was  
373 considered serious, with resolution in one day. CPET for both these participants was stopped.  
374 There were no statistically significant differences in the number of risk alerts during CPET  
375 across age groups, frailty status, gait speed, multimorbidity status or obesity (Supplemental  
376 Tables 1 -3).

377

### 378 *Ventilatory Indices*

379 Men had higher  $VO_2$ peak values on average than women (Table 3). The average maximum  
380 HR during Phase 2 (Peak) did not differ by sex. Men had a slightly higher maximum RER value  
381 during Phase 2 than women. (Figure 2). The average percentage of the maximum HR to the age-  
382 predicted maximum heart rate was  $91.72 \pm 11.42$ , with 60% reaching 90% or more of their age-  
383 predicted maximum heart rate.

384 The average treadmill speed for Phase 1 (PWS) was  $1.05 \pm 0.18$  m/s, with an average  $EC_w$  of  
385  $12.44 \pm 2.49$  mL/kg/min, and a cost-capacity ratio of  $63.21\% \pm 12.39\%$ . On average, men had  
386 higher PWS and  $EC_w$ , and lower cost-capacity ratio than women.

387 For Phase 3 (SWS) the average  $EC_w$  was  $9.46 \pm 1.64$  mL/kg/min, and an average cost-  
388 capacity ratio of  $48.81 \pm 12.56$ . On average, men had higher  $EC_w$  and lower cost-capacity ratio  
389 than women.

390 For all but recurrent fallers, the average  $\text{VO}_2\text{peak}$  was significantly lower among those in the  
391 compromised group (Supplemental Figure 1). Those 85 years and older had a lower average  
392  $\text{VO}_2\text{peak}$  by 2.87 mL/kg/min compared to younger participants, those classified as frail had a  
393 lower average  $\text{VO}_2\text{peak}$  by 4.62 mL/kg/min compared to non-frail participants, those slow  
394 walkers had a lower average  $\text{VO}_2\text{peak}$  by 4.49 mL/kg/min compared to faster walkers, those with  
395  $\geq 3$  comorbidities had a lower average  $\text{VO}_2\text{peak}$  by 3.23 mL/kg/min compared to those with 0-2  
396 comorbidities, and obese participants had a lower average  $\text{VO}_2\text{peak}$  by 3.50 mL/kg/min  
397 compared to those with  $\text{BMI} < 30 \text{ kg/m}^2$ .  $\text{VO}_2\text{peak}$  declined with age (Figure 2).

398

### 399 *Adjudication Process*

400 Of the 852 participants that performed Phase 2 (Peak), 47 (5.5%) were flagged for  
401 adjudication. (Figure 3) The majority ( $n=28$ ) were due to low  $\text{VO}_2\text{peak}$  ( $\text{VO}_2 < 12 \text{ mL/kg/min}$ ),  
402 while 21 had low HR (maximum HR  $< 100 \text{ bpm}$ ). Of the 47 adjudicated, data were deemed valid  
403 for 20 (42.6%). Nine (19.1%) were adjudicated as invalid because the participant was not able to  
404 complete the test. Eighteen (38.3%) were adjudicated as invalid, primarily due to technical or  
405 other unknown issues with the gas exchange data.

406

### 407 *Repeatability*

408 The measurement of the Phase 2 (Peak) was highly reproducible (Table 4). The reliability as  
409 shown by the ICC demonstrated almost perfect agreement for  $\text{VO}_2\text{peak}$  (0.97), and substantial  
410 agreement for maximum HR, RER and RPE (0.74 - 0.86). The Bland-Altman plots for these  
411 measures (Figure 4) illustrate a random scattering of points above and below the average mean

412 difference with few points falling outside the 95% CI, showing a lack of systematic bias between  
413 the first and second measurements. The formal tests of heteroscedasticity were not significant  
414 ( $p > 0.05$ ). Results from mixed models for the Phase 2 measures did not show systematic bias  
415 based on study site ( $p > 0.07$ ) or whether the measurement was from the original or repeat  
416 measurement ( $p > 0.09$ ).

417 Likewise, the reliability of  $EC_w$  for Phases 1 and 3 (PWS, SWS) had strong agreement (ICCs  
418 0.84, 0.78), but a poor agreement for RPE (ICCs 0.44, 0.19). Paired t-tests between the original  
419 and repeat measures from these phases showed a significant difference for  $EC_w$ , RPE and cost-  
420 capacity ratio, with the original measurements being higher on average than the repeat measures.  
421 Results from mixed models did not show any systematic bias based on study site ( $p > 0.09$ ), but  
422 did show a systematic bias for whether the measurement was from the original or repeat  
423 measurement for  $EC_w$  and cost-capacity ratio for both phases, and RPE for Phase 1 ( $p < 0.05$ ).

424

## 425 **DISCUSSION**

426 The primary finding from this study is that CPET was highly feasible and safe to effectively  
427 obtain  $VO_{2peak}$  as the criterion measure of CRF among older community-dwelling adults,  
428 including many with phenotypic features of frailty, multimorbidity, and poor physical function.  
429 Of the 879 participants enrolled in SOMMA, 99.7% were deemed eligible for CPET, and of  
430 those, 97.3% completed the peak exercise protocol. After adjudication, we obtained valid  
431  $VO_{2peak}$  values in 96.2% who attempted the test. Only 25 participants terminated CPET early.  
432 While others have reported results from CPET in older adults, they have been from smaller  
433 studies or conglomerations of multiple studies<sup>32-35</sup>; and most lacked details regarding participant

434 selection, or excluded participants with poor physical function, frailty or multimorbidity.

435 Therefore, our study provides more generalizable data on the feasibility, safety and efficacy of  
436 CPET across a wider range of older adults.

437 The utility of CPET for older adults has often been questioned, largely because of safety  
438 concerns or reservations that many older adults cannot achieve peak exercise thresholds<sup>15,36</sup>  
439 and/or that they are unable to achieve sufficient motivation or stability to achieve high exercise  
440 workloads. In SOMMA, we created a working group to design the CPET protocol specifically  
441 for older adults. We implemented a familiarization protocol, protocol standardization, quality  
442 control, safety alerts, and an adjudication process to assess valid VO<sub>2</sub>peak tests. Because of these  
443 rigorous methods, we obtained valid ventilatory measurements and had few risk alerts along with  
444 a very high proportion of individuals who reliably achieved VO<sub>2</sub>peak. This is particularly  
445 important for multicenter, longitudinal studies.

446 One of the key findings is that CPET is feasible and safe in community-dwelling older adults  
447 with a range of disease risk, disease burden and physical function when those with active  
448 cardiopulmonary disease and very slow gait speed have been excluded. Although procedures  
449 were implemented to exclude those in whom maximal exertion exercise was contraindicated,  
450 only 1 participant was not cleared for any phase of CPET and 19 (2%) were not cleared for Phase  
451 2 (Peak), with a remarkably high proportion of participants having completed Phase 2 without  
452 incident. We monitored potential risk and uncovered a relatively small number of symptoms and  
453 ECG abnormalities. There were only two adverse events, one considered mild severity.

454 There were no significant differences in the number of risk alerts during CPET across age  
455 groups, frailty status, gait speed, multimorbidity status or obesity. Only 12.5% of alerts during  
456 CPET were from previously known conditions. Notably, 29% of participants with risk indicators



457 during provocative exercise testing had a pre-CPET risk alert, suggesting high clinical value of  
458 CPET, as well as predominant safety of the assessment. Our results confirm the utility of CPET  
459 for ventilatory assessments in older adults, as well as for HR, BP, ECG, and other valuable  
460 nonventilatory physiology.<sup>13</sup>

461 These SOMMA CPET data also provide an opportunity to evaluate additional metrics,  
462 including submaximal respiratory data. The SOMMA cohort included participants at the lower  
463 end of physical function in which CPET data are limited. The safety of CPET has been reported  
464 previously, mostly in patients with cardiovascular and pulmonary disease<sup>37</sup>, but also among  
465 generally healthy adults.<sup>35</sup> Still, less is known about the safety of CPET specifically in older  
466 adults, especially those with compromised physical function. Participant selection criteria, the  
467 diversity of populations studied and the CPET protocol all make it difficult to compare CPET  
468 safety across studies, yet our study strengthens rationale and method for application of CPET in  
469 older adults.

470 The average and range of VO<sub>2</sub>peak values in SOMMA are consistent with other databases  
471 and smaller studies in older adults.<sup>33-35</sup> The recently published Fitness Registry and the  
472 Importance of Exercise: A National Data Base (FRIEND) showed VO<sub>2</sub>peak ranged from 13.6-  
473 29.4 ml/kg/min in septuagenarian men and 12.3-22.8 ml/kg/min in septuagenarian women.<sup>35</sup> As  
474 in SOMMA, CRF is lower in older versus younger adults, and lower in women versus men, and  
475 there is heterogeneity among those being tested. SOMMA stands out in comparison to these  
476 reports by clarifying the functional impact of multimorbidity, frailty, obesity and other factors  
477 that are rarely assessed in CPET analyses. Future SOMMA analyses will explore in depth the  
478 associations of CPET with these factors. Reliable measures of VO<sub>2</sub>peak will be crucial to  
479 understand the mechanism underlying CRF and physical function. For example, we have

480 reported in SOMMA that VO<sub>2</sub>peak is strongly associated with skeletal muscle mitochondrial  
481 energetics.<sup>38</sup> Longitudinal SOMMA data will be instrumental in determining a role for CRF in  
482 mobility decline.

483 Repeated CPET showed excellent reproducibility for VO<sub>2</sub>peak. These data are consistent  
484 with previous reports which showed similarly strong test-retest reproducibility.<sup>39,40</sup> The low RPE  
485 ICC during PWS and SWS may be attributed to a familiarization bias. There were no systematic  
486 site differences for any of the measures across all phases, showing consistency between multiple  
487 operators at multiple sites. Given that SOMMA entails treadmill exercise, the reproducibility  
488 data are even more notable.

489

#### 490 ***Limitations***

491 Race and ethnic subgroups were not large enough to assess the differences of race/ethnicity.  
492 Further, SOMMA excluded candidates who could not complete the 400-meter walk or who  
493 walked <0.6 m/s over 4 meters, so results cannot be extended to those with more significant  
494 mobility disability.

495

#### 496 ***Conclusions***

497 As a critical part of SOMMA we employed a CPET protocol that is feasible, safe, and  
498 effective in older adults with a wide range of physical function and disease, and could be used  
499 reliably as part of a multicenter study. SOMMA achieved high quality assessments of peak  
500 performance as well as submaximal assessments of walking efficiency. CPET data will provide a

501 critical window into potential mechanisms underlying the biological aging process and risk for  
502 functional decline and morbidity. Moreover, implications of the SOMMA CPET protocol imply  
503 broader clinical and research potential, with generalizable efficacy for clinical care and research  
504 assessments among older adults. SOMMA uniquely demonstrates the value and utility of CPET,  
505 with potential to better understand and moderate organ and cellular changes that are associated  
506 with aging.

507

508 **ARTICLE INFORMATION**

509 **Acknowledgements**

510 CPET Working Group: Elvis A. Carnero; Steve Anthony; Cheyenne Barnett; Terri Blackwell;  
511 Peggy Cawthon; Amelia Cervantes; Robin Collins; Michelle Danielson; Daniel Forman; Nancy  
512 Glynn; Bret Goodpaster; Michelle Gordon; Teresa Harnish; Eileen Johnson; Justin Johnson ;  
513 Kim Kennedy; Reagan Moffit; Anne Newman; Barbara Nicklas; Benjamin Schumacher;  
514 Frederico G. S. Toledo; April Tuttle; Katey Webber; Cody Wolf.

515

516 **Sources of Funding**

517 The Study of Muscle, Mobility and Aging is supported by funding from the National Institute on  
518 Aging, grant number AG059416.” Study infrastructure support was funded in part by NIA  
519 Claude D. Pepper Older American Independence Centers at University of Pittsburgh  
520 (P30AG024827) and Wake Forest University (P30AG021332) and the Clinical and Translational  
521 Science Institutes, funded by the National Center for Advancing Translational Science, at Wake  
522 Forest University (UL1 0TR001420).

523 **Disclosures**

524 All authors report no conflicts.

525 **Supplemental Material**

526 **Tables S1-S3**

527 **Figure S1**

528

529 **REFERENCES**

- 530 1. Balady GJ, Arena R, Sietsema K, Myers J, Coke L, Fletcher GF, Forman D, Franklin B,  
531 Guazzi M, Gulati M, et al. Interdisciplinary Council on Quality of Care and Outcomes  
532 Research. Clinician's Guide to cardiopulmonary exercise testing in adults: a scientific  
533 statement from the American Heart Association. *Circulation*. 2010;122:191-225. doi:  
534 10.1161/CIR.0b013e3181e52e69.
- 535
- 536 2. Ross R, Blair SN, Arena R, Church TS, Després JP, Franklin BA, Haskell WL,  
537 Kaminsky LA, Levine BD, Lavie CJ, et al. Importance of Assessing Cardiorespiratory  
538 Fitness in Clinical Practice: A Case for Fitness as a Clinical Vital Sign: A Scientific  
539 Statement From the American Heart Association. *Circulation*. 2016;134:e653-e699. doi:  
540 10.1161/CIR.0000000000000461.
- 541
- 542 3. Ghosh S, Hota M, Chai X, Kiranya J, Ghosh P, He Z, Ruiz-Ramie JJ, Sarzynski MA,  
543 Bouchard C. Exploring the underlying biology of intrinsic cardiorespiratory fitness  
544 through integrative analysis of genomic variants and muscle gene expression profiling. *J*  
545 *Appl Physiol*. (1985). 2019;126:1292-1314. doi: 10.1152/jappphysiol.00035.2018.
- 546
- 547 4. Ferrazza AM, Martolini D, Valli G, Palange P. Cardiopulmonary exercise testing in the  
548 functional and prognostic evaluation of patients with pulmonary diseases. *Respiration*.  
549 2009;77:3-17. doi: 10.1159/000186694.

550

- 551 5. Tran, D. (2018). Cardiopulmonary Exercise Testing. In P. C. Guest (Ed.), Investigations  
552 of Early Nutrition Effects on Long-Term Health: Methods and Applications (pp. 285-  
553 295). New York, NY: Springer New York.
- 554
- 555 6. Forman DE, Myers J, Lavie CJ, Guazzi M, Celli B, Arena R. Cardiopulmonary exercise  
556 testing: relevant but underused. *Postgrad Med.* 2010;122:68-86. doi:  
557 10.3810/pgm.2010.11.2225.
- 558
- 559 7. Decato TW, Bradley SM, Wilson EL, Hegewald MJ. Repeatability and Meaningful  
560 Change of CPET Parameters in Healthy Subjects. *Med Sci Sports Exerc.* 2018;50:589-  
561 595. doi: 10.1249/MSS.0000000000001474.
- 562
- 563 8. Davies LC, Francis DP, Piepoli M, Scott AC, Ponikowski P, Coats AJ. Chronic heart  
564 failure in the elderly: value of cardiopulmonary exercise testing in risk stratification.  
565 *Heart.* 2000;832:147-51. doi: 10.1136/heart.83.2.147.
- 566
- 567 9. Mejhert M, Linder-Klingsell E, Edner M, Kahan T, Persson H. Ventilatory variables are  
568 strong prognostic markers in elderly patients with heart failure. *Heart.* 2002;88:239-43.  
569 doi: 10.1136/heart.88.3.239.

570

- 571 10. Richardson CA, Glynn NW, Ferrucci LG, Mackey DC. Walking energetics, fatigability,  
572 and fatigue in older adults: the study of energy and aging pilot. *J Gerontol A Biol Sci Med*  
573 *Sci.* 2015;70:487-94. doi: 10.1093/gerona/glu146.
- 574
- 575 11. Schrack JA, Simonsick EM, Ferrucci L. The relationship of the energetic cost of slow  
576 walking and peak energy expenditure to gait speed in mid-to-late life. *Am J Phys Med*  
577 *Rehabil.* 2013;92:28-35. doi: 10.1097/PHM.0b013e3182644165.
- 578
- 579 12. Guralnik JM, Ferrucci L, Simonsick EM, Salive ME, Wallace RB. Lower-extremity  
580 function in persons over the age of 70 years as a predictor of subsequent disability. *N*  
581 *Engl J Med.* 1995;332:556-61. doi: 10.1056/NEJM199503023320902.
- 582
- 583 13. Forman DE, Arena R, Boxer R, Dolansky MA, Eng JJ, Fleg JL, Haykowsky M, Jahangir  
584 A, Kaminsky LA, Kitzman DW, et al. Prioritizing Functional Capacity as a Principal End  
585 Point for Therapies Oriented to Older Adults With Cardiovascular Disease: A Scientific  
586 Statement for Healthcare Professionals From the American Heart Association.  
587 *Circulation.* 2017;135:e894-e918. doi: 10.1161/CIR.0000000000000483.
- 588
- 589 14. Dhakal BP, Malhotra R, Murphy RM, Pappagianopoulos PP, Baggish AL, Weiner RB,  
590 Houstis NE, Eisman AS, Hough SS, Lewis GD. Mechanisms of exercise intolerance in  
591 heart failure with preserved ejection fraction: the role of abnormal peripheral oxygen

592 extraction. *Circ Heart Fail.* 2015;8:286-94. doi:

593 10.1161/CIRCHEARTFAILURE.114.001825.

594

595 15. Huggett DL, Connelly DM, Overend TJ. Maximal aerobic capacity testing of older

596 adults: a critical review. *J Gerontol A Biol Sci Med Sci.* 2005;60:57-66. doi:

597 10.1093/gerona/60.1.57.

598

599 16. Church TS, Gill TM, Newman AB, Blair SN, Earnest CP, Pahor M. Maximal fitness

600 testing in sedentary elderly at substantial risk of disability: LIFE-P study experience. *J*

601 *Aging Phys Act.* 2008;16:408-15. doi: 10.1123/japa.16.4.408.

602

603 17. Gill TM, DiPietro L, Krumholz HM. Role of exercise stress testing and safety monitoring

604 for older persons starting an exercise program. *JAMA.* 2000;284:342-9. doi:

605 10.1001/jama.284.3.342.

606

607 18. Freemas JA, Wilhite DP, Greenshields JT, Adamic EM, Mickleborough TD. Comparison

608 between a facemask and mouthpiece on breathing mechanics and gas exchange variables

609 during high-intensity exercise. *Eur J Sport Sci.* 2020;20:211-218. doi:

610 10.1080/17461391.2019.1628309.

611

612 19. Cummings SR, Newman AB, Coen PM, Hepple RT, Collins R, Kennedy K, Danielson

613 M, Peters K, Blackwell T, Johnson E, et al. The Study of Muscle, Mobility and Aging



- 614 (SOMMA). A Unique Cohort Study about the Cellular Biology of Aging and Age-related  
615 Loss of Mobility. *J Gerontol A Biol Sci Med Sci*. 2023 Feb 9:glad052. doi:  
616 10.1093/gerona/glad052. Epub ahead of print. PMID: 36754371.
- 617
- 618 20. Liguori Feito Y, Fountaine C, & Roy B. G. ACSM's guidelines for exercise testing and  
619 prescription. *American College of Sports Medicine*. 2022;Eleventh edition.
- 620
- 621 21. Borg GA. Psychophysical bases of perceived exertion. *Med Sci Sports Exerc*.  
622 1982;14:377-81.
- 623
- 624 22. Andresen EM, Malmgren JA, Carter WB, Patrick DL. Screening for depression in well  
625 older adults: evaluation of a short form of the CES-D (Center for Epidemiologic Studies  
626 Depression Scale). *Am J Prev Med*. 1994;10:77-84.
- 627
- 628 23. Espeland MA, Crimmins EM, Grossardt BR, Crandall JP, Gelfond JA, Harris TB,  
629 Kritchevsky SB, Manson JE, Robinson JG, Rocca WA, et al. Clinical Trials Targeting  
630 Aging and Age-Related Multimorbidity. *J Gerontol A Biol Sci Med Sci*. 2017;72:355-  
631 361. doi: 10.1093/gerona/glw220.
- 632
- 633 24. Fried LP, Tangen CM, Walston J, Newman AB, Hirsch C, Gottdiener J, Seeman T, Tracy  
634 R, Kop WJ, Burke G, et al. Frailty in older adults: evidence for a phenotype. *J Gerontol A  
635 Biol Sci Med Sci*. 2001;56:M146-56. doi: 10.1093/gerona/56.3.m146.

- 636
- 637 25. Fitti JE, Kovar MG. The Supplement on Aging to the 1984 National Health Interview  
638 Survey. *Vital Health Stat 1*. 1987;(21):1-115.
- 639
- 640 26. Pincus T, Summey JA, Soraci SA Jr, Wallston KA, Hummon NP. Assessment of patient  
641 satisfaction in activities of daily living using a modified Stanford Health Assessment  
642 Questionnaire. *Arthritis Rheum*. 1983;26:1346-53. doi: 10.1002/art.1780261107.
- 643
- 644 27. Stewart AL, Mills KM, King AC, Haskell WL, Gillis D, Ritter PL. CHAMPS physical  
645 activity questionnaire for older adults: outcomes for interventions. *Med Sci Sports Exerc*.  
646 2001;33:1126-41. doi: 10.1097/00005768-200107000-00010.
- 647
- 648 28. Tanaka H, Monahan KD, Seals DR. Age-predicted maximal heart rate revisited. *J Am*  
649 *Coll Cardiol*. 2001;37:153-6. doi: 10.1016/s0735-1097(00)01054-8.
- 650
- 651 29. Shrout PE, Fleiss JL. Intraclass correlations: uses in assessing rater reliability. *Psychol*  
652 *Bull*. 1979;86:420-8. doi: 10.1037//0033-2909.86.2.420.
- 653
- 654 30. Bland JM, Altman DG. Statistical methods for assessing agreement between two methods  
655 of clinical measurement. *Lancet*. 1986;1(8476):307-10.
- 656

- 657 31. Hopkins WG. Measures of reliability in sports medicine and science. *Sports Med.*  
658 2000;30:1-15. doi: 10.2165/00007256-200030010-00001.
- 659
- 660 32. Scardovi AB, De Maria R, Celestini A, Perna S, Coletta C, Feola M, Aspromonte N,  
661 Rosso GL, Carunchio A, Ferraironi A, et al. Additive prognostic value of  
662 cardiopulmonary exercise testing in elderly patients with heart failure. *Clin Sci (Lond).*  
663 2009;116:415-22. doi: 10.1042/CS20080111.
- 664
- 665 33. Edvardsen E, Hansen BH, Holme IM, Dyrstad SM, Anderssen SA. Reference values for  
666 cardiorespiratory response and fitness on the treadmill in a 20- to 85-year-old population.  
667 *Chest.* 2013;144:241-248. doi: 10.1378/chest.12-1458.
- 668
- 669 34. Loe H, Rognmo Ø, Saltin B, Wisløff U. Aerobic capacity reference data in 3816 healthy  
670 men and women 20-90 years. *PLoS One.* 2013;8:e64319. doi:  
671 10.1371/journal.pone.0064319. Erratum in: *PLoS One.* 2013;8(11).  
672 doi:10.1371/annotation/e3115a8e-ca9d-4d33-87ef-f355f07db28e.
- 673
- 674 35. Kaminsky LA, Arena R, Myers J, Peterman JE, Bonikowske AR, Harber MP, Medina  
675 Inojosa JR, Lavie CJ, Squires RW. Updated Reference Standards for Cardiorespiratory  
676 Fitness Measured with Cardiopulmonary Exercise Testing: Data from the Fitness  
677 Registry and the Importance of Exercise National Database (FRIEND). *Mayo Clin Proc.*  
678 2022;97:285-293. doi: 10.1016/j.mayocp.2021.08.020.

- 679
- 680 36. Kwok JM, Miller TD, Hodge DO, Gibbons RJ. Prognostic value of the Duke treadmill  
681 score in the elderly. *J Am Coll Cardiol.* 2002;39:1475-81. doi: 10.1016/s0735-  
682 1097(02)01769-2.
- 683
- 684 37. Guazzi M, Bandera F, Ozemek C, Systrom D, Arena R. Cardiopulmonary Exercise  
685 Testing: What Is its Value? *J Am Coll Cardiol.* 2017;70:1618-1636. doi:  
686 10.1016/j.jacc.2017.08.012.
- 687
- 688 38. Mau T, Lui LY, Distefano G, Kramer PA, Ramos SV, Toledo FGS, Santanasto AJ,  
689 Shankland EG, Marcinek DJ, Jurczak MJ, et al. Mitochondrial energetics in skeletal  
690 muscle are associated with leg power and cardiorespiratory fitness in the Study of  
691 Muscle, Mobility, and Aging (SOMMA). *J Gerontol A Biol Sci Med Sci.* 2023;78:1367-  
692 1375. doi: 10.1093/gerona/glac238.
- 693
- 694 39. Marburger CT, Brubaker PH, Pollock WE, Morgan TM, Kitzman DW. Reproducibility  
695 of cardiopulmonary exercise testing in elderly patients with congestive heart failure. *Am J*  
696 *Cardiol.* 1998;82:905-9. doi: 10.1016/s0002-9149(98)00502-5.
- 697
- 698 40. Barron A, Dhutia N, Mayet J, Hughes AD, Francis DP, Wensel R. Test-retest  
699 repeatability of cardiopulmonary exercise test variables in patients with cardiac or

700 respiratory disease. *Eur J Prev Cardiol.* 2014;21:445-53. doi:

701 10.1177/2047487313518474.

702

703 Table 1. Risk Alerts occurring during CPET Eligibility or Testing: The Study of Muscle,  
704 Mobility and Aging (SOMMA)

| Risk Alert Parameter                                                                           | Pre-CPET<br>(N= 876) | Phase 1<br>(PWS)<br>(N= 875) | Phase 2<br>(Peak)<br>(N= 852) | Phase 3<br>(SWS)<br>(N= 863) |
|------------------------------------------------------------------------------------------------|----------------------|------------------------------|-------------------------------|------------------------------|
| <b>Alerts During Eligibility Screening:</b>                                                    | 149 (17.01)          |                              |                               |                              |
| <b>High Risk</b>                                                                               |                      |                              |                               |                              |
| <b>Electrocardiogram</b>                                                                       |                      |                              |                               |                              |
| Atrial fibrillation/other supraventricular tachycardia with rate >100 (and no medical history) | 1                    |                              |                               |                              |
| Substantial ventricular ectopy                                                                 | 0                    |                              |                               |                              |
| Acute infarct pattern                                                                          | 2                    |                              |                               |                              |
| Acute ischemia pattern of ST-T changes                                                         | 0                    |                              |                               |                              |
| Acute pericarditis pattern                                                                     | 0                    |                              |                               |                              |
| 2 <sup>nd</sup> degree (type 2) or 3 <sup>rd</sup> degree block                                | 0                    |                              |                               |                              |
| QRS widening >120ms (no history of bundle branch block)                                        | 17                   |                              |                               |                              |
| Other acute abnormalities                                                                      | 2                    |                              |                               |                              |
| <b>Blood Pressure</b>                                                                          |                      |                              |                               |                              |
| Systolic >180 mmHg or <90 mmHg                                                                 | 1                    |                              |                               |                              |
| Diastolic >110 mmHg                                                                            | 0                    |                              |                               |                              |
| <b>Heart Rate</b>                                                                              |                      |                              |                               |                              |
| <40 bpm or >110 bpm                                                                            | 1                    |                              |                               |                              |
| <b>Low Risk</b>                                                                                |                      |                              |                               |                              |
| <b>Electrocardiogram</b>                                                                       |                      |                              |                               |                              |
| Pre-excitation                                                                                 | 0                    |                              |                               |                              |
| 1 <sup>st</sup> or 2 <sup>nd</sup> (type 1) degree heart block                                 | 56                   |                              |                               |                              |
| Other non-acute abnormalities                                                                  | 16                   |                              |                               |                              |
| <b>Blood Pressure</b>                                                                          |                      |                              |                               |                              |
| Systolic 160 to ≤180 or 90-100 mmHg                                                            | 28                   |                              |                               |                              |
| Diastolic 100 to ≤110 mmHg                                                                     | 6                    |                              |                               |                              |
| <b>Heart Rate</b>                                                                              |                      |                              |                               |                              |
| 90-110 bpm or 40-50 bpm                                                                        | 43                   |                              |                               |                              |
| <b>Alerts During CPET:</b>                                                                     |                      | 5 (0.57)                     | 51 (5.99)                     | 2 (0.23)                     |
| <b>High Risk</b>                                                                               |                      |                              |                               |                              |
| Atrial fibrillation/other supraventricular tachycardia with rate >100 (and no medical history) |                      | 1                            | 8                             | 0                            |
| Substantial ventricular ectopy                                                                 |                      | 0                            | 5                             | 0                            |
| Acute ischemia pattern of ST-T changes                                                         |                      | 3                            | 27                            | 1                            |
| QRS widening >120ms (no history of bundle branch block)                                        |                      | 0                            | 1                             | 0                            |
| Other acute abnormalities                                                                      |                      | 1                            | 5                             | 0                            |
| Significant Pain                                                                               |                      | 3                            | 0                             | 0                            |
| Other Alert                                                                                    |                      | 0                            | 1                             | 0                            |
| Adverse Event: Participant fell                                                                |                      | 0                            | 1                             | 0                            |
| <b>Low Risk</b>                                                                                |                      |                              |                               |                              |
| Other non-acute abnormalities                                                                  |                      | 0                            | 5                             | 0                            |
| Systolic 160 to ≤180 or 90-100 mmHg                                                            |                      | 0                            | 3                             | 0                            |
| 90-110 bpm or 40-50 bpm                                                                        |                      | 1                            | 4                             | 1                            |
| Phase stopped early?                                                                           |                      |                              |                               |                              |
| Completed                                                                                      |                      | 3                            | NA                            | 2                            |
| Stopped early                                                                                  |                      | 2                            | NA                            | 0                            |
| Participant went on to the next Phase                                                          |                      | 1                            | 43                            | NA                           |

705 Abbreviations: CPET, cardiopulmonary exercise testing; PWS, Preferred Walking Speed; SWS,  
706 Slow Walking Speed. Data shown as n (%) or n.  
707 Note: Data is on a participant level, so one participant may have multiple events.  
708 High risk alert: requiring review by the medical safety officer/study physician prior to participant  
709 leaving clinic or the same day as the clinic being notified of the finding;  
710 Low risk alert: requiring review by the medical safety officer/study physician by at least the next  
711 business day of observation or notification of the finding, with recommended follow-up with the  
712 participant (if any) taken no more than 10 days after observation or notification of the finding, or  
713 sooner if deemed medically necessary.  
714

715 Table 2. Baseline Characteristics by CPET Eligibility: The Study of Muscle, Mobility and  
716 Aging (SOMMA)

| Characteristic                                                                      | All<br>(N= 875) | All 3 Phases<br>(N= 856) | Phase 1, 3 only<br>(N= 19) | P-value* |
|-------------------------------------------------------------------------------------|-----------------|--------------------------|----------------------------|----------|
| Site                                                                                |                 |                          |                            | <0.001   |
| University of Pittsburgh                                                            | 437 (49.94)     | 435 (50.82)              | 2 (10.53)                  |          |
| Wake Forest University School of Medicine                                           | 438 (50.06)     | 421 (49.18)              | 17 (89.47)                 |          |
| Age (years)                                                                         | 76.34 ± 4.99    | 76.28 ± 4.96             | 79.11 ± 5.74               | 0.01     |
| Sex                                                                                 |                 |                          |                            |          |
| Women                                                                               | 517 (59.09)     | 505 (59.00)              | 12 (63.16)                 | 0.72     |
| Men                                                                                 | 358 (40.91)     | 351 (41.00)              | 7 (36.84)                  |          |
| Race                                                                                |                 |                          |                            | 0.59     |
| Black                                                                               | 115 (13.14)     | 113 (13.20)              | 2 (10.53)                  |          |
| White                                                                               | 742 (84.80)     | 726 (84.81)              | 16 (84.21)                 |          |
| Other race                                                                          | 18 (2.06)       | 17 (1.99)                | 1 (5.26)                   |          |
| Smoking status                                                                      |                 |                          |                            | 0.48     |
| Never                                                                               | 490 (56.32)     | 477 (56.05)              | 13 (68.42)                 |          |
| Past                                                                                | 355 (40.80)     | 349 (41.01)              | 6 (31.58)                  |          |
| Current                                                                             | 25 (2.87)       | 25 (2.94)                | 0                          |          |
| Beta blocker use with 30 days of baseline                                           | 163 (18.67)     | 156 (18.27)              | 7 (36.84)                  | 0.07     |
| CHAMPS: Hours/week in moderate-intensity exercise-related activities (MET $\geq$ 3) | 7.03 ± 7.09     | 7.06 ± 7.12              | 5.57 ± 5.08                | 0.48     |
| Body mass index (kg/m <sup>2</sup> )                                                | 27.60 ± 4.56    | 27.58 ± 4.56             | 28.22 ± 4.69               | 0.55     |
| Body mass index $\geq$ 30 kg/m <sup>2</sup>                                         | 250 (28.57)     | 243 (28.39)              | 7 (36.84)                  | 0.42     |
| 4-meter walk gait speed (m/s)                                                       | 1.04 ± 0.20     | 1.04 ± 0.20              | 0.88 ± 0.12                | <0.001   |
| 4-meter walk gait speed $\leq$ 0.8 m/s                                              | 89 (10.17)      | 84 (9.81)                | 5 (26.32)                  | 0.04     |
| SOMMA Multimorbidity Index (0-11)                                                   |                 |                          |                            |          |
| 0                                                                                   | 371 (42.99)     | 364 (43.13)              | 7 (36.84)                  | 0.07     |
| 1                                                                                   | 340 (39.40)     | 335 (39.69)              | 5 (26.32)                  |          |
| 2                                                                                   | 111 (12.86)     | 107 (12.68)              | 4 (21.05)                  |          |
| 3+                                                                                  | 41 (4.75)       | 38 (4.50)                | 3 (15.79)                  |          |
| History of:                                                                         |                 |                          |                            |          |
| Cancer, excluding non-melanoma skin cancer                                          | 217 (24.89)     | 210 (24.62)              | 7 (36.84)                  | 0.28     |
| Cardiac arrhythmia (atrial fibrillation)                                            | 34 (3.90)       | 31 (3.63)                | 3 (15.79)                  | 0.03     |
| Chronic kidney disease or renal failure                                             | 33 (3.79)       | 33 (3.87)                | 0                          | 1.00     |
| Chronic obstructive pulmonary disease/other lung disease                            | 115 (13.19)     | 111 (13.01)              | 4 (21.05)                  | 0.30     |
| Coronary heart disease                                                              | 59 (6.77)       | 56 (6.57)                | 3 (15.79)                  | 0.13     |
| Congestive heart failure                                                            | 6 (0.69)        | 6 (0.70)                 | 0                          | 1.00     |
| Depression (CES-D-10 $\geq$ 10)                                                     | 73 (8.45)       | 71 (8.40)                | 2 (10.53)                  | 0.67     |
| Diabetes mellitus                                                                   | 131 (15.02)     | 128 (15.01)              | 3 (15.79)                  | 1.00     |
| Stroke                                                                              | 21 (2.41)       | 20 (2.34)                | 1 (5.26)                   | 0.37     |
| Aortic stenosis                                                                     | 8 (0.92)        | 7 (0.82)                 | 1 (5.26)                   | 0.16     |
| Age-Predicted Maximal Heart Rate (bpm)                                              | 154.56 ± 3.49   | 154.60 ± 3.47            | 152.63 ± 4.02              | 0.01     |
| Recurrent faller (2+ in past year)                                                  | 111 (12.73)     | 105 (12.31)              | 6 (31.58)                  | 0.03     |
| Any difficulty walking 2-3 blocks                                                   | 33 (3.81)       | 31 (3.65)                | 2 (11.11)                  | 0.15     |
| Frailty status                                                                      |                 |                          |                            |          |
| Robust                                                                              | 386 (44.11)     | 382 (44.63)              | 4 (21.05)                  | <0.001   |
| Intermediate (pre-frail)                                                            | 423 (48.34)     | 414 (48.36)              | 9 (47.37)                  |          |
| Frail                                                                               | 66 (7.54)       | 60 (7.01)                | 6 (31.58)                  |          |



717 Abbreviations: CES-D, Center for Epidemiological Studies-Depression; CHAMPS, Community Healthy  
718 Activities Model Program for Seniors; CPET, cardiopulmonary exercise testing; MET, metabolic  
719 equivalent of task; SOMMA, Study of Muscle, Mobility and Aging.  
720 Data shown as mean  $\pm$  SD or n(%)  
721 \*P-values from a t-test for normally distributed continuous variables, a Wilcoxon rank-sum test for  
722 skewed continuous data, a chi-square test for categorical data or a Fisher's exact test for categorical data  
723 with low expected cell counts.  
724

725 Tables 3. CPET measures by sex: The Study of Muscle, Mobility and Aging (SOMMA)

| CPET Measure                                 | All<br>(N= 875)  | Men<br>(N= 358)  | Women<br>(N= 517) | P-value* |
|----------------------------------------------|------------------|------------------|-------------------|----------|
| <b>Phase 1: Preferred Walking Speed</b>      |                  |                  |                   |          |
| Energetic cost of walking (mL/kg/min)        | 12.44 ± 2.49     | 12.95 ± 2.47     | 12.07 ± 2.44      | <.0001   |
| Rating of Perceived Exertion (6-20)          | 10.50 ± 2.03     | 10.32 ± 2.03     | 10.64 ± 2.02      | 0.02     |
| Heart rate (bpm)                             | 103.74 ± 17.22   | 99.35 ± 16.48    | 106.82 ± 17.08    | <.0001   |
| Respiratory exchange ratio                   | 0.90 ± 0.09      | 0.90 ± 0.09      | 0.89 ± 0.09       | 0.11     |
| Treadmill speed (m/s)                        | 1.05 ± 0.18      | 1.08 ± 0.17      | 1.02 ± 0.18       | <.0001   |
| Cost-Capacity Ratio (%)                      | 63.21 ± 12.39    | 59.90 ± 12.96    | 65.61 ± 11.39     | <.0001   |
| <b>Phase 2: Peak</b>                         |                  |                  |                   |          |
| VO <sub>2</sub> peak (mL/kg/min)             | 20.22 ± 4.82     | 22.27 ± 5.00     | 18.75 ± 4.11      | <.0001   |
| VO <sub>2</sub> peak (mL/min)                | 1528.30 ± 433.40 | 1865.62 ± 410.69 | 1286.95 ± 248.94  | <.0001   |
| Maximum Rating of Perceived Exertion (6-20)  | 17.65 ± 1.42     | 17.66 ± 1.37     | 17.64 ± 1.46      | 0.91     |
| Maximum heart rate (bpm)                     | 141.87 ± 18.00   | 140.50 ± 18.24   | 142.82 ± 17.79    | 0.07     |
| Maximum heart rate as a percentage of APMHR  | 91.72 ± 11.42    | 90.85 ± 11.59    | 92.33 ± 11.27     | 0.06     |
| Respiratory exchange ratio at peak           | 1.13 ± 0.09      | 1.13 ± 0.09      | 1.12 ± 0.09       | 0.02     |
| Maximum Respiratory exchange ratio           | 1.14 ± 0.09      | 1.15 ± 0.08      | 1.14 ± 0.09       | 0.04     |
| <b>Phase 3: Slow Walking Speed (1.5 mph)</b> |                  |                  |                   |          |
| Energetic cost of walking (mL/kg/min)        | 9.46 ± 1.64      | 9.61 ± 1.59      | 9.35 ± 1.66       | 0.02     |
| Rating of Perceived Exertion (6-20)          | 8.41 ± 1.90      | 8.18 ± 1.70      | 8.57 ± 2.01       | 0.008    |
| Heart rate (bpm)                             | 100.08 ± 15.78   | 96.73 ± 15.41    | 102.40 ± 15.63    | <.0001   |
| Respiratory exchange ratio                   | 0.80 ± 0.06      | 0.80 ± 0.06      | 0.80 ± 0.07       | 0.13     |
| Cost-Capacity Ratio (%)                      | 48.81 ± 12.56    | 44.90 ± 11.22    | 51.61 ± 12.73     | <.0001   |

726 Abbreviations: APMHR, Age-Predicted Maximal Heart Rate; CPET, cardiopulmonary exercise  
 727 testing; PWS, Preferred Walking Speed; SWS, Slow Walking Speed; VO<sub>2</sub>, oxygen consumption;  
 728 VO<sub>2</sub>peak, peak oxygen consumption.

729 Data shown as mean ± SD or n(%)

730 \*P-values from a t-test for normally distributed continuous variables, a Wilcoxon rank-sum test  
 731 for skewed continuous data.

Table 4. CPET repeatability (n=30): The Study of Muscle, Mobility and Aging (SOMMA)

| CPET Measure                                 | Original         | Repeat           | Difference*<br>(Original - Repeat) | Absolute<br>Difference | Pearson<br>Correlation<br>(95% CI)** | CV    | ICC<br>(95% CI)    |
|----------------------------------------------|------------------|------------------|------------------------------------|------------------------|--------------------------------------|-------|--------------------|
| <b>Phase 1: Preferred Walking Speed</b>      |                  |                  |                                    |                        |                                      |       |                    |
| Energetic cost of walking (mL/kg/min)        | 12.55 ± 2.69     | 11.90 ± 2.62     | 0.64 ± 1.37*                       | 1.01 ± 1.11            | 0.87 (0.74, 0.94)                    | 11.17 | 0.84 (0.92, 0.70)  |
| Rating of Perceived Exertion (6-20)          | 10.13 ± 2.03     | 9.21 ± 2.02      | 0.93 ± 2.00*                       | 1.69 ± 1.39            | 0.52 (0.19, 0.75)                    | 20.65 | 0.44 (0.69, 0.11)  |
| Heart rate (bpm)                             | 103.27 ± 13.76   | 102.63 ± 13.27   | 0.63 ± 8.51                        | 6.70 ± 5.13            | 0.80 (0.62,0.90)                     | 8.26  | 0.81 (0.90,0.64)   |
| Respiratory exchange ratio                   | 0.90 ± 0.09      | 0.90 ± 0.06      | 0.00 ± 0.05                        | 0.04 ± 0.03            | 0.78 (0.58,0.89)                     | 6.12  | 0.75 (0.87,0.54)   |
| Cost-capacity ratio (%)                      | 61.68 ± 13.23    | 59.55 ± 12.80    | 2.13 ± 5.25*                       | 4.32 ± 3.60            | 0.92 (0.84, 0.96)                    | 8.66  | 0.91 (0.96, 0.82)  |
| <b>Phase 2: Peak</b>                         |                  |                  |                                    |                        |                                      |       |                    |
| VO <sub>2</sub> peak (mL/kg/min)             | 21.06 ± 5.87     | 20.66 ± 5.55     | 0.40 ± 1.39                        | 1.12 ± 0.90            | 0.97 (0.94, 0.99)                    | 6.68  | 0.97 (0.98, 0.94)  |
| VO <sub>2</sub> peak (mL/min)                | 1580.70 ± 439.64 | 1546.50 ± 400.52 | 34.20 ± 109.33                     | 85.47 ± 74.88          | 0.97 (0.94, 0.99)                    | 6.99  | 0.96 (0.98, 0.93)  |
| Maximum Rating of Perceived Exertion (6-20)  | 17.80 ± 1.42     | 17.73 ± 1.17     | 0.07 ± 0.94                        | 0.67 ± 0.66            | 0.75 (0.54, 0.88)                    | 5.32  | 0.74 (0.87, 0.53)  |
| Maximum heart rate (bpm)                     | 144.00 ± 18.65   | 141.90 ± 17.32   | 2.10 ± 9.30                        | 7.83 ± 5.26            | 0.87 (0.74, 0.94)                    | 6.51  | 0.86 (0.93, 0.74)  |
| Maximum Respiratory exchange ratio           | 1.15 ± 0.09      | 1.14 ± 0.07      | 0.00 ± 0.06                        | 0.04 ± 0.04            | 0.77 (0.57, 0.89)                    | 4.96  | 0.76 (0.88, 0.56)  |
| VCO <sub>2</sub> (mL/min) at peak            | 1799.83 ± 519.13 | 1741.63 ± 445.89 | 58.20 ± 159.88                     | 122.87 ± 115.97        | 0.96 (0.91, 0.98)                    | 9.03  | 0.94 (0.97, 0.88)  |
| VE/VO <sub>2</sub> ratio at peak             | 39.87 ± 7.46     | 38.90 ± 5.56     | 0.97 ± 4.54                        | 3.17 ± 3.34            | 0.80 (0.61, 0.90)                    | 11.52 | 0.76 (0.88, 0.56)  |
| End-tidal carbon dioxide (mmHg) at peak      | 34.53 ± 4.76     | 34.43 ± 4.48     | 0.10 ± 2.17                        | 1.43 ± 1.61            | 0.89 (0.78, 0.95)                    | 6.30  | 0.89 (0.95, 0.79)  |
| <b>Phase 3: Slow Walking Speed (1.5 mph)</b> |                  |                  |                                    |                        |                                      |       |                    |
| Energetic cost of walking (mL/kg/min)        | 9.68 ± 1.71      | 9.14 ± 1.51      | 0.54 ± 0.94*                       | 0.80 ± 0.73            | 0.84 (0.68, 0.92)                    | 10.02 | 0.78 (0.89, 0.60)  |
| Rating of Perceived Exertion (6-20)          | 8.33 ± 1.75      | 8.17 ± 1.69      | 0.21 ± 2.21*                       | 1.52 ± 1.60            | 0.18 (-0.20, 0.51)                   | 26.77 | 0.19 (0.51, -0.18) |
| Heart rate (bpm)                             | 102.00 ± 12.79   | 100.07 ± 9.99    | 1.93 ± 8.02                        | 6.53 ± 4.90            | 0.78 (0.58,0.89)                     | 7.93  | 0.75 (0.87,0.54)   |
| Respiratory exchange ratio                   | 0.80 ± 0.06      | 0.80 ± 0.06      | 0.00 ± 0.06                        | 0.04 ± 0.03            | 0.60 (0.30,0.79)                     | 6.96  | 0.60 (0.79,0.32)   |
| Cost-capacity ratio (%)                      | 48.58 ± 12.95    | 46.58 ± 11.72    | 2.00 ± 4.16*                       | 3.40 ± 3.08            | 0.95 (0.89, 0.98)                    | 8.74  | 0.93 (0.97, 0.86)  |

Abbreviations: CPET, cardiopulmonary exercise testing; CI, confidence interval; CV, coefficient of variation; ICC, intraclass correlation coefficient; VCO<sub>2</sub>, carbon dioxide exhalation; VE, minute ventilation; VO<sub>2</sub>, oxygen inhalation; VO<sub>2</sub>peak, peak oxygen inhalation.

\*paired t-tests (original and repeat) p<0.05.

\*\*All p-values <0.01.

Figure 1. CPET performed in the Study of Muscle, Mobility and Aging (SOMMA)

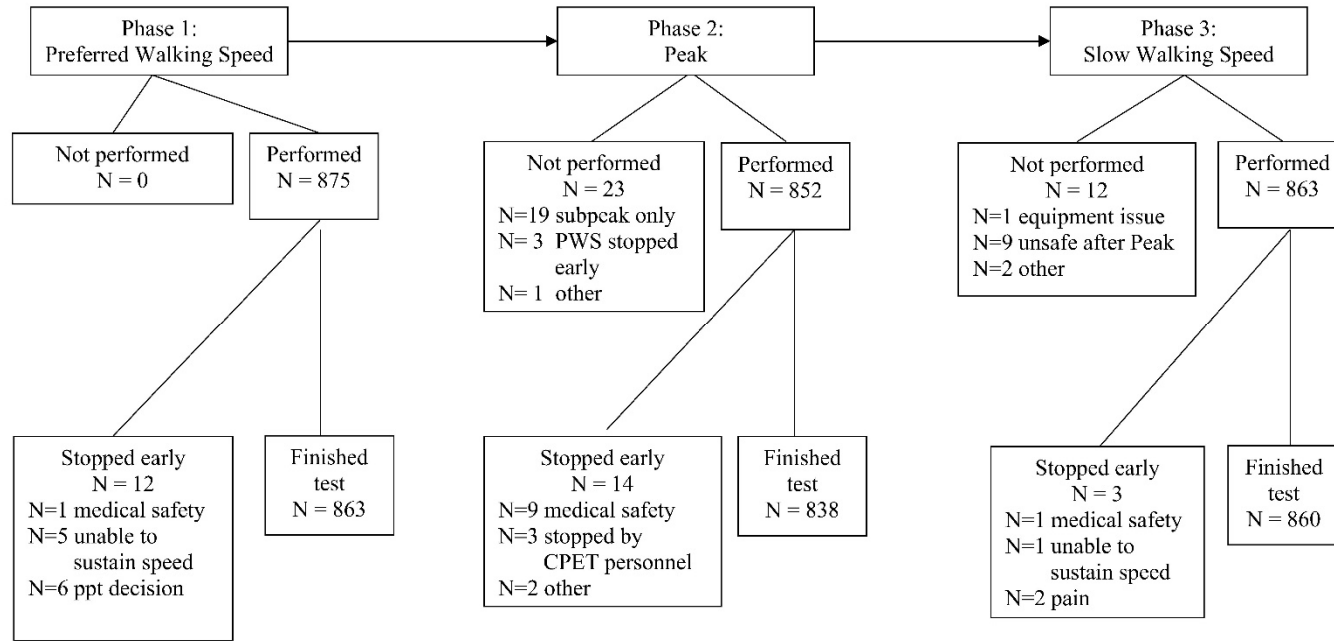

Abbreviations: CPET, cardiopulmonary exercise testing; ppt, participant; PWS, Preferred Walking Speed; SOMMA, Study of Muscle, Mobility and Aging.

Figure 2: Distributions of CPET measures from Phase 2 (Peak) by Sex: The Study of Muscle, Mobility and Aging (SOMMA)

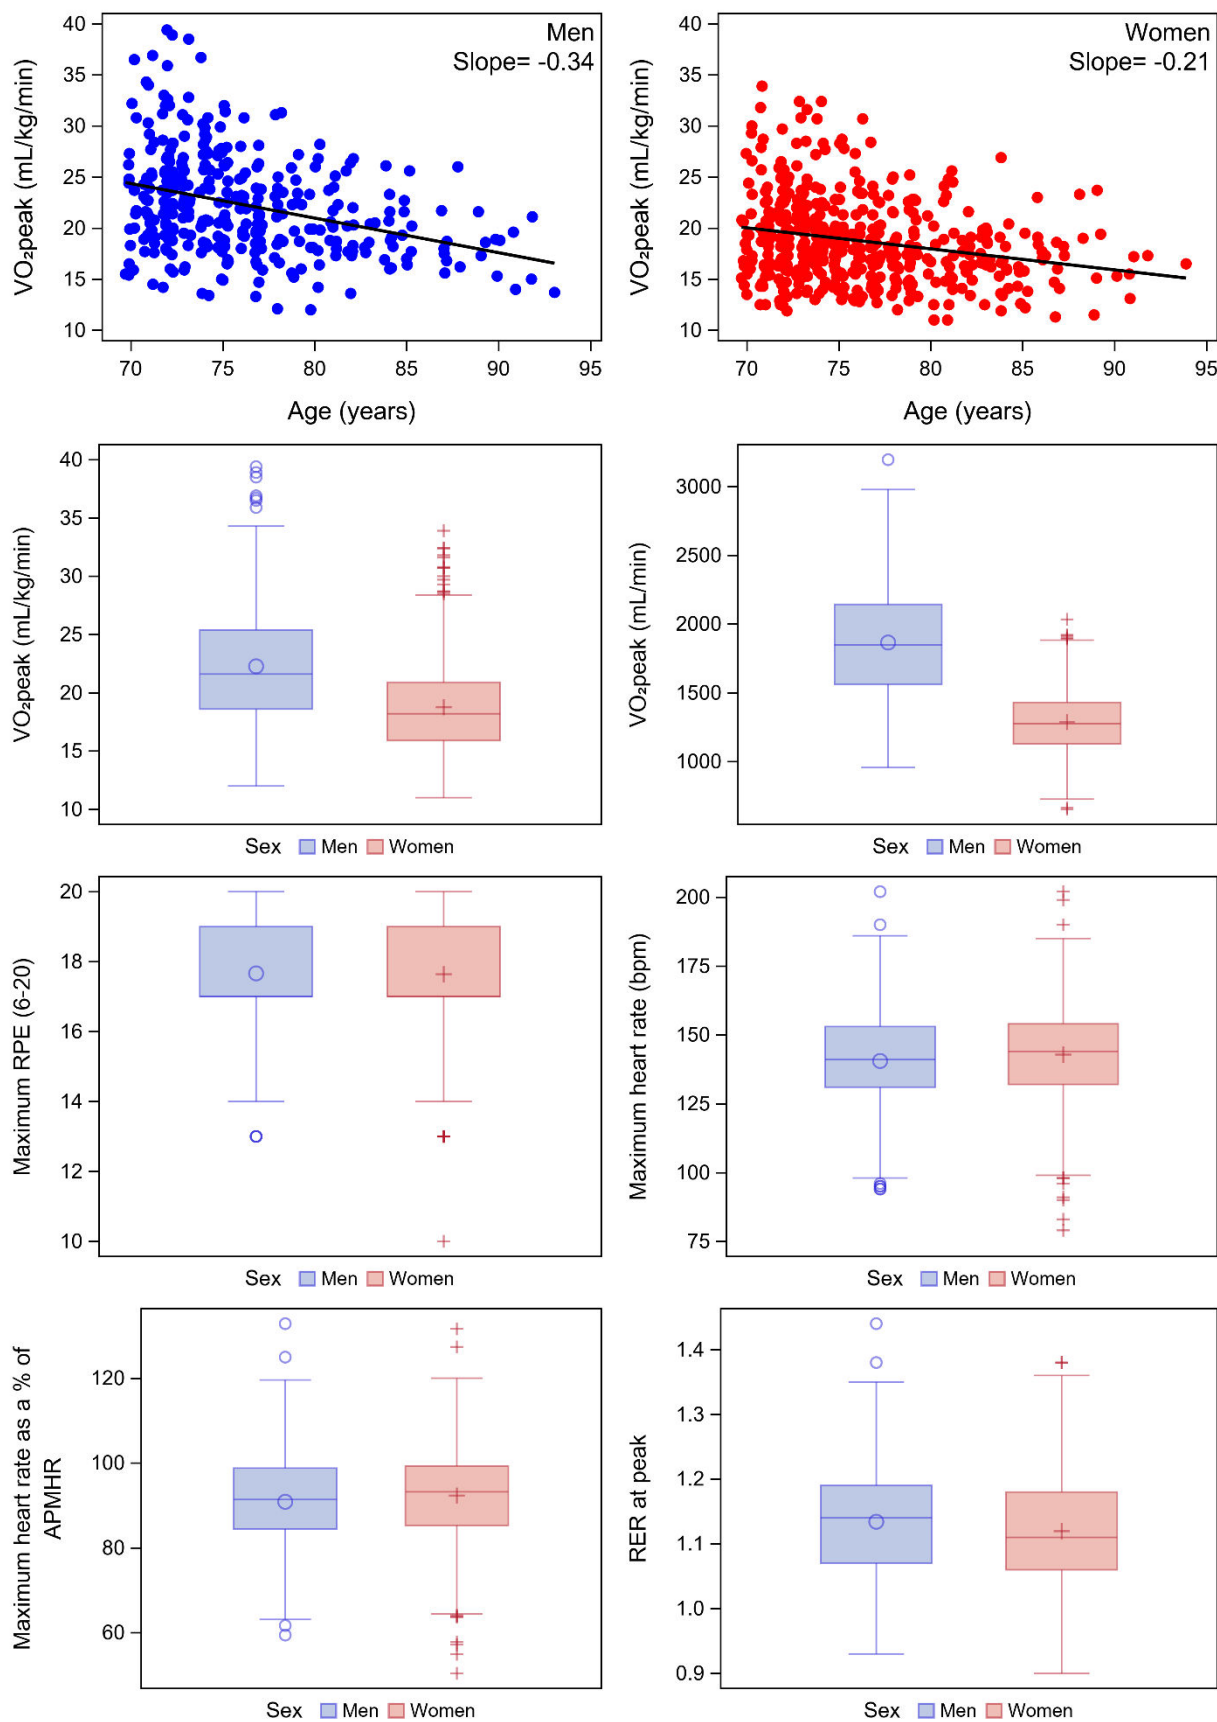

Abbreviations: APMHR, Age-Predicted Maximal Heart Rate; CPET, cardiopulmonary exercise testing; RER, respiratory exchange ratio; RPE, rating of perceived exertion;  $VO_2$ peak, peak oxygen consumption.

Figure 3. Adjudication Process for CPET data in the Study of Muscle, Mobility and Aging (SOMMA)

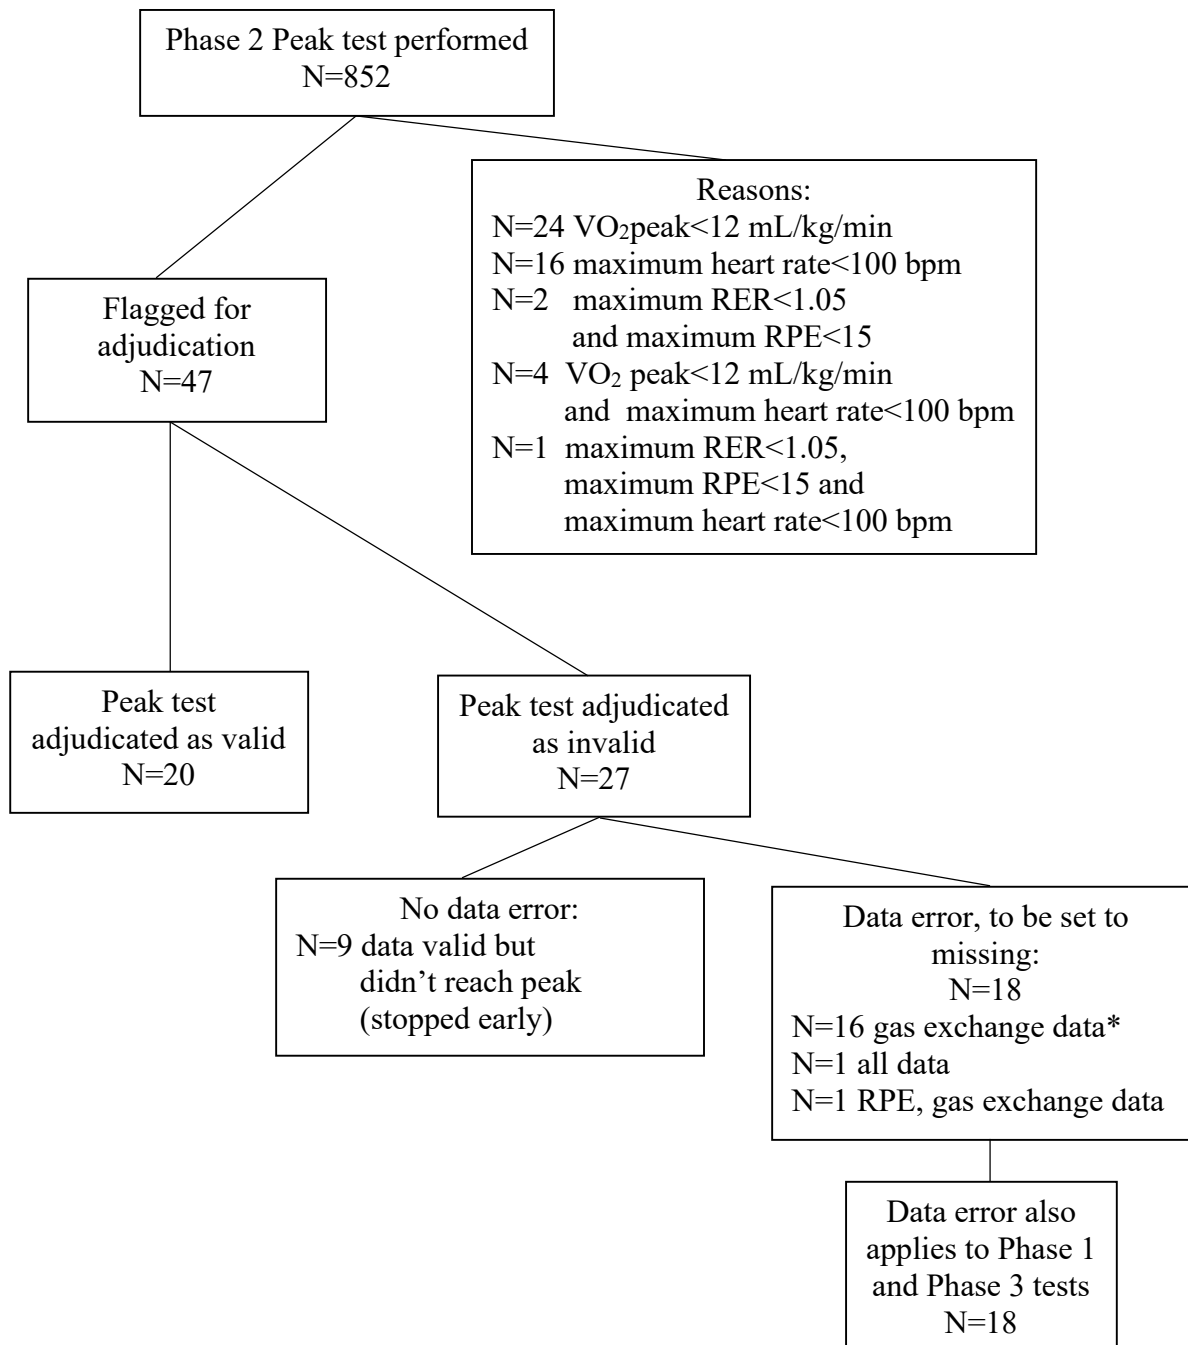

\*Gas exchange was measured with a Medgraphics (N=12) or a Hans Rudolph (N=6) mask  
Abbreviations: CPET, cardiopulmonary exercise testing; RER, respiratory exchange ratio; RPE, rating of perceived exertion; SOMMA, Study of Muscle, Mobility and Aging; VO<sub>2</sub>peak, peak oxygen utilization.

Figure 4. Bland-Altman plots showing the agreement between the original and repeat CPETs: The Study of Muscle, Mobility and Aging (SOMMA)

A.  $VO_{2peak}$  (mL/kg/min)

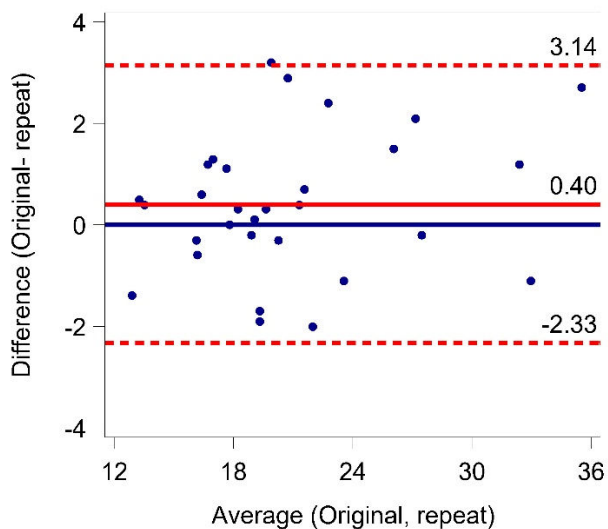

B. Maximum RER

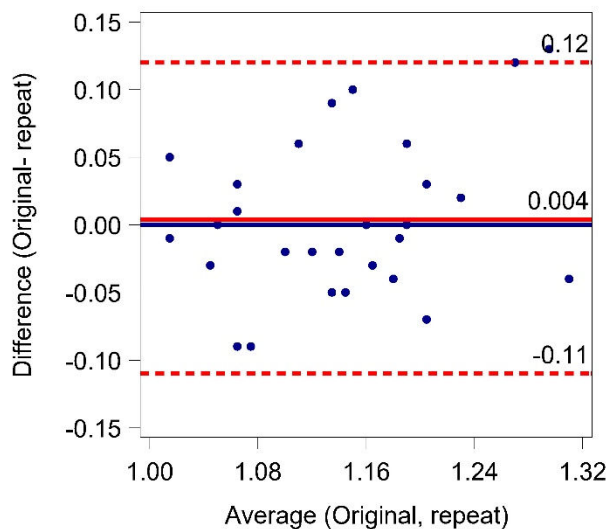

C. Maximum heart rate (bpm)

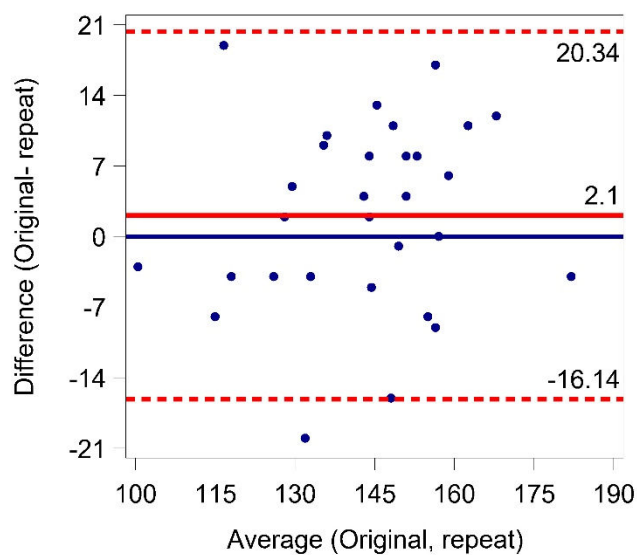

D. Maximum RPE

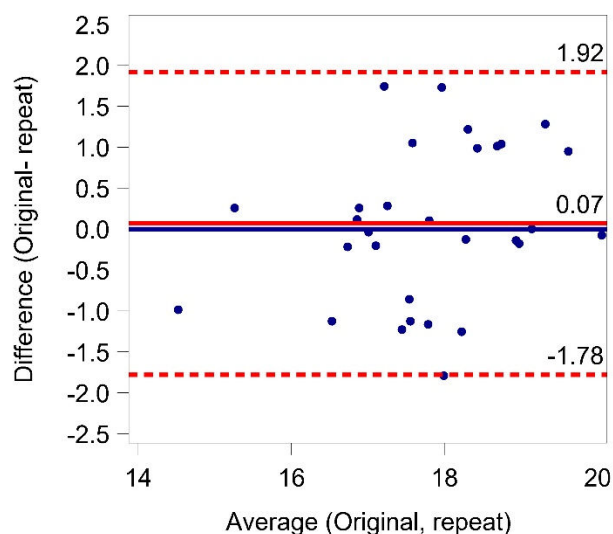

Abbreviations: CPET, cardiopulmonary exercise testing; RER: respiratory exchange ratio; RPE: rating of perceived exertion;  $VO_{2peak}$ , peak oxygen consumption.

Dotted lines represent upper and lower 95% limits of agreement. The unbroken red line represents mean differences.
